# Supplementary material for: Duration of contact sports play associated with aberrant DNA methylation in human frontal cortex
Source: Research Square preprint supplement (doi:10.21203/rs.3.rs-7861173/v1), 2025-12-01
Supplement: Supplementary file 1 [file 18ccc1df37e7bee142fd6653.xlsx]

## Sheet: Sheet1
Chr	Pos	Beta	SE	P	Average_methylation	Closest_Gene	Function	FDR
chr17	30846388	-0.379883	0.0462239	3.85e-11	0.877678	MYO1D	Intron	1.36e-05
chr17	30846393	-0.379944	0.0462879	4e-11	0.878053	MYO1D	Intron	1.36e-05
chr17	30846407	-0.379808	0.0464603	4.53e-11	0.879084	MYO1D	Intron	1.36e-05
chr17	30846421	-0.37924	0.0466221	5.27e-11	0.880086	MYO1D	Intron	1.36e-05
chr17	30846258	-0.357372	0.0443616	7.07e-11	0.866532	MYO1D	Intron	1.36E-05
chr17	30846447	-0.377107	0.0468915	7.45e-11	0.881868	MYO1D	Intron	1.36E-05
chr17	30846252	-0.355417	0.0442784	7.88e-11	0.865951	MYO1D	Intron	1.36E-05
chr17	30846242	-0.352011	0.0441426	9.6e-11	0.864971	MYO1D	Intron	1.36E-05
chr17	30846239	-0.350955	0.0441026	1.02e-10	0.864674	MYO1D	Intron	1.36E-05
chr17	30846473	-0.373708	0.0471174	1.13e-10	0.883553	MYO1D	Intron	1.36E-05
chr17	30846476	-0.373242	0.0471406	1.19e-10	0.883741	MYO1D	Intron	1.36E-05
chr17	30846490	-0.37088	0.0472407	1.53e-10	0.884602	MYO1D	Intron	1.36E-05
chr17	30846493	-0.370335	0.0472604	1.61e-10	0.884783	MYO1D	Intron	1.36E-05
chr17	30846496	-0.369778	0.0472795	1.71e-10	0.884963	MYO1D	Intron	1.36E-05
chr17	30846499	-0.369208	0.0472981	1.81e-10	0.885142	MYO1D	Intron	1.36E-05
chr17	30846505	-0.368031	0.0473333	2.03e-10	0.885495	MYO1D	Intron	1.36E-05
chr17	30846210	-0.340002	0.0437369	2.04e-10	0.861725	MYO1D	Intron	1.36E-05
chr17	30846204	-0.337587	0.0436664	2.4e-10	0.861097	MYO1D	Intron	1.36E-05
chr17	30846514	-0.366178	0.0473818	2.42e-10	0.886016	MYO1D	Intron	1.36E-05
chr17	30846520	-0.364886	0.0474111	2.73e-10	0.886357	MYO1D	Intron	1.36E-05
chr17	30846524	-0.364002	0.0474294	2.96e-10	0.886582	MYO1D	Intron	1.36E-05
chr17	30846526	-0.363552	0.0474382	3.09e-10	0.886694	MYO1D	Intron	1.36E-05
chr17	30846529	-0.36287	0.0474508	3.28e-10	0.88686	MYO1D	Intron	1.36E-05
chr17	30846531	-0.36241	0.0474589	3.42e-10	0.886971	MYO1D	Intron	1.36E-05
chr17	30846190	-0.331784	0.0435095	3.56e-10	0.859611	MYO1D	Intron	1.36E-05
chr17	30846535	-0.361476	0.0474744	3.72e-10	0.88719	MYO1D	Intron	1.36E-05
chr17	30846546	-0.358824	0.0475118	4.7e-10	0.887781	MYO1D	Intron	1.36E-05
chr4	154606033	-0.213368	0.0282583	4.73e-10	0.863139	TLR2	Intron	1.36E-05
chr4	154606018	-0.213325	0.0282529	4.73e-10	0.863043	TLR2	Intron	1.36E-05
chr4	154606004	-0.213281	0.0282475	4.73e-10	0.862953	TLR2	Intron	1.36E-05
chr4	154605993	-0.213243	0.0282429	4.73e-10	0.862882	TLR2	Intron	1.36E-05
chr4	154605984	-0.213211	0.028239	4.73e-10	0.862824	TLR2	Intron	1.36E-05
chr4	154605979	-0.213193	0.0282368	4.73e-10	0.862792	TLR2	Intron	1.36E-05
chr4	154605970	-0.213158	0.0282327	4.74e-10	0.862734	TLR2	Intron	1.36E-05
chr4	154605961	-0.213122	0.0282284	4.74e-10	0.862675	TLR2	Intron	1.36E-05
chr4	154605953	-0.213089	0.0282244	4.74e-10	0.862624	TLR2	Intron	1.36E-05
chr4	154605941	-0.213037	0.0282182	4.74e-10	0.862546	TLR2	Intron	1.36E-05
chr4	154605929	-0.212983	0.0282117	4.75e-10	0.862467	TLR2	Intron	1.36E-05
chr4	154605893	-0.212802	0.0281906	4.76e-10	0.862232	TLR2	Intron	1.36E-05
chr4	154605870	-0.212674	0.0281758	4.77e-10	0.862081	TLR2	Intron	1.36E-05
chr4	154605857	-0.212597	0.0281669	4.78e-10	0.861995	TLR2	Intron	1.36E-05
chr4	154605788	-0.212135	0.0281142	4.82e-10	0.861536	TLR2	Intron	1.36E-05
chr4	154605768	-0.211984	0.0280971	4.83e-10	0.861402	TLR2	Intron	1.36E-05
chr4	154605761	-0.21193	0.028091	4.84e-10	0.861355	TLR2	Intron	1.36E-05
chr4	154605751	-0.21185	0.028082	4.85e-10	0.861288	TLR2	Intron	1.36E-05
chr4	154605745	-0.211801	0.0280765	4.85e-10	0.861247	TLR2	Intron	1.36E-05
chr4	154605727	-0.21165	0.0280596	4.87e-10	0.861126	TLR2	Intron	1.36E-05
chr4	154605725	-0.211633	0.0280577	4.87e-10	0.861112	TLR2	Intron	1.36E-05
chr4	154605717	-0.211564	0.02805	4.88e-10	0.861058	TLR2	Intron	1.36E-05
chr4	154605702	-0.211431	0.0280351	4.89e-10	0.860956	TLR2	Intron	1.36E-05
chr4	154605598	-0.210384	0.0279197	5.01e-10	0.860242	TLR2	Intron	1.36E-05
chr17	30846549	-0.35808	0.0475207	5.01e-10	0.88794	MYO1D	Intron	1.36E-05
chr4	154605591	-0.210306	0.0279111	5.02e-10	0.860194	TLR2	Intron	1.36E-05
chr4	154605580	-0.210181	0.0278975	5.03e-10	0.860117	TLR2	Intron	1.36E-05
chr4	154605570	-0.210065	0.0278849	5.05e-10	0.860048	TLR2	Intron	1.36E-05
chr4	154605565	-0.210007	0.0278785	5.05e-10	0.860013	TLR2	Intron	1.36E-05
chr4	154605479	-0.208921	0.0277612	5.19e-10	0.859408	TLR2	5_UTR	1.36E-05
chr4	154605476	-0.208881	0.0277569	5.2e-10	0.859387	TLR2	5_UTR	1.36E-05
chr4	154605468	-0.208772	0.0277452	5.21e-10	0.85933	TLR2	5_UTR	1.36E-05
chr4	154605458	-0.208633	0.0277304	5.23e-10	0.859259	TLR2	5_UTR	1.36E-05
chr4	154605450	-0.208521	0.0277184	5.25e-10	0.859202	TLR2	5_UTR	1.36E-05
chr4	154605441	-0.208394	0.0277048	5.27e-10	0.859138	TLR2	5_UTR	1.36E-05
chr4	154605436	-0.208322	0.0276972	5.28e-10	0.859102	TLR2	5_UTR	1.36E-05
chr4	154605388	-0.207609	0.0276215	5.38e-10	0.858758	TLR2	Intergenic (nearest gene 15 bp away)	1.36E-05
chr4	154605384	-0.207548	0.0276149	5.39e-10	0.858729	TLR2	Intergenic (nearest gene 19 bp away)	1.36E-05
chr4	154605364	-0.207235	0.0275819	5.44e-10	0.858585	TLR2	Intergenic (nearest gene 39 bp away)	1.36E-05
chr4	154605357	-0.207124	0.0275702	5.46e-10	0.858534	TLR2	Intergenic (nearest gene 46 bp away)	1.36E-05
chr4	154605346	-0.206947	0.0275516	5.48e-10	0.858454	TLR2	Intergenic (nearest gene 57 bp away)	1.36E-05
chr4	154605339	-0.206833	0.0275396	5.5e-10	0.858403	TLR2	Intergenic (nearest gene 64 bp away)	1.36E-05
chr4	154605335	-0.206767	0.0275328	5.51e-10	0.858374	TLR2	Intergenic (nearest gene 68 bp away)	1.36E-05
chr4	154605332	-0.206718	0.0275276	5.52e-10	0.858352	TLR2	Intergenic (nearest gene 71 bp away)	1.36E-05
chr4	154605327	-0.206635	0.0275189	5.53e-10	0.858316	TLR2	Intergenic (nearest gene 76 bp away)	1.36E-05
chr4	154605321	-0.206535	0.0275084	5.55e-10	0.858272	TLR2	Intergenic (nearest gene 82 bp away)	1.36E-05
chr17	30846558	-0.355799	0.0475442	6.09e-10	0.888408	MYO1D	Intron	1.47E-05
chr17	30846562	-0.354762	0.0475531	6.64e-10	0.888613	MYO1D	Intron	1.58E-05
chr17	30846564	-0.354239	0.0475572	6.94e-10	0.888715	MYO1D	Intron	1.63E-05
chr17	30846573	-0.351845	0.0475728	8.47e-10	0.889167	MYO1D	Intron	1.68E-05
chr17	30846579	-0.350215	0.0475807	9.68e-10	0.889462	MYO1D	Intron	1.68E-05
chr11	91958719	-0.354567	0.0483425	1.07e-09	0.838985	FAT3	Intergenic (nearest gene 126542 bp away)	1.68E-05
chr11	91958686	-0.356322	0.0485843	1.07e-09	0.841564	FAT3	Intergenic (nearest gene 126575 bp away)	1.68E-05
chr11	91958736	-0.353662	0.0482237	1.07e-09	0.837715	FAT3	Intergenic (nearest gene 126525 bp away)	1.68E-05
chr11	91958675	-0.356899	0.0486676	1.07e-09	0.842454	FAT3	Intergenic (nearest gene 126586 bp away)	1.68E-05
chr11	91958655	-0.357929	0.0488216	1.08e-09	0.844107	FAT3	Intergenic (nearest gene 126606 bp away)	1.68E-05
chr11	91958643	-0.358532	0.0489153	1.09e-09	0.84512	FAT3	Intergenic (nearest gene 126618 bp away)	1.68E-05
chr11	91958598	-0.360637	0.049271	1.13e-09	0.84904	FAT3	Intergenic (nearest gene 126663 bp away)	1.68E-05
chr17	30846586	-0.348282	0.0475875	1.13e-09	0.889801	MYO1D	Intron	1.68E-05
chr11	91958585	-0.361189	0.0493737	1.15e-09	0.850204	FAT3	Intergenic (nearest gene 126676 bp away)	1.68E-05
chr11	91958578	-0.361475	0.0494287	1.16e-09	0.850836	FAT3	Intergenic (nearest gene 126683 bp away)	1.68E-05
chr11	91958575	-0.361595	0.0494523	1.16e-09	0.851108	FAT3	Intergenic (nearest gene 126686 bp away)	1.68E-05
chr11	91958573	-0.361674	0.0494679	1.17e-09	0.85129	FAT3	Intergenic (nearest gene 126688 bp away)	1.68E-05
chr10	1101841	-0.148786	0.0203722	1.2e-09	0.855797	IDI1	Intron	1.68E-05
chr10	1101851	-0.148747	0.0203755	1.21e-09	0.855931	IDI1	Intron	1.68E-05
chr11	91958540	-0.362865	0.0497224	1.23e-09	0.854325	FAT3	Intergenic (nearest gene 126721 bp away)	1.68E-05
chr10	1101873	-0.148661	0.0203832	1.25e-09	0.856223	IDI1	Intron	1.68E-05
chr10	1101893	-0.148581	0.0203907	1.28e-09	0.856489	IDI1	Intron	1.68E-05
chr10	1101895	-0.148573	0.0203915	1.28e-09	0.856516	IDI1	Intron	1.68E-05
chr10	1101897	-0.148565	0.0203923	1.29e-09	0.856542	IDI1	Intron	1.68E-05
chr10	1101900	-0.148553	0.0203934	1.29e-09	0.856582	IDI1	Intron	1.68E-05
chr17	30846592	-0.346599	0.0475912	1.3e-09	0.890087	MYO1D	Intron	1.68E-05
chr10	1101905	-0.148533	0.0203955	1.3e-09	0.856648	IDI1	Intron	1.68E-05
chr10	1101909	-0.148516	0.0203971	1.31e-09	0.856701	IDI1	Intron	1.68E-05
chr17	30846596	-0.345465	0.0475926	1.42e-09	0.890275	MYO1D	Intron	1.68E-05
chr18	29265441	-0.252273	0.0348476	1.53e-09	0.897565	B4GALT6	Intergenic (nearest gene 755 bp away)	1.68E-05
chr18	29265438	-0.252261	0.0348462	1.53e-09	0.897629	B4GALT6	Intergenic (nearest gene 752 bp away)	1.68E-05
chr18	29265446	-0.252289	0.0348504	1.53e-09	0.897461	B4GALT6	Intergenic (nearest gene 760 bp away)	1.68E-05
chr18	29265449	-0.252297	0.0348523	1.53e-09	0.897399	B4GALT6	Intergenic (nearest gene 763 bp away)	1.68E-05
chr18	29265431	-0.252228	0.0348435	1.53e-09	0.897778	B4GALT6	Intergenic (nearest gene 745 bp away)	1.68E-05
chr18	29265456	-0.252308	0.0348574	1.54e-09	0.897256	B4GALT6	Intergenic (nearest gene 770 bp away)	1.68E-05
chr18	29265424	-0.252186	0.0348417	1.54e-09	0.897931	B4GALT6	Intergenic (nearest gene 738 bp away)	1.68E-05
chr11	91958440	-0.364885	0.0504165	1.54e-09	0.863846	FAT3	Intergenic (nearest gene 126821 bp away)	1.68E-05
chr18	29265420	-0.252158	0.0348411	1.54e-09	0.898019	B4GALT6	Intergenic (nearest gene 734 bp away)	1.68E-05
chr18	29265416	-0.252128	0.0348408	1.55e-09	0.898108	B4GALT6	Intergenic (nearest gene 730 bp away)	1.68E-05
chr18	29265414	-0.252111	0.0348408	1.55e-09	0.898153	B4GALT6	Intergenic (nearest gene 728 bp away)	1.68E-05
chr18	29265412	-0.252094	0.0348408	1.55e-09	0.898198	B4GALT6	Intergenic (nearest gene 726 bp away)	1.68E-05
chr18	29265407	-0.252048	0.0348412	1.56e-09	0.898311	B4GALT6	Intergenic (nearest gene 721 bp away)	1.68E-05
chr18	29265405	-0.252028	0.0348416	1.56e-09	0.898356	B4GALT6	Intergenic (nearest gene 719 bp away)	1.68E-05
chr18	29265476	-0.252286	0.0348775	1.56e-09	0.896865	B4GALT6	Intergenic (nearest gene 790 bp away)	1.68E-05
chr11	91959050	-0.344782	0.0476705	1.57e-09	0.824973	FAT3	Intergenic (nearest gene 126211 bp away)	1.68E-05
chr18	29265485	-0.252249	0.0348893	1.58e-09	0.896696	B4GALT6	Intergenic (nearest gene 799 bp away)	1.68E-05
chr18	29265394	-0.251908	0.0348446	1.59e-09	0.89861	B4GALT6	Intergenic (nearest gene 708 bp away)	1.68E-05
chr18	29265487	-0.252238	0.0348921	1.59e-09	0.896659	B4GALT6	Intergenic (nearest gene 801 bp away)	1.68E-05
chr18	29265389	-0.251846	0.0348466	1.6e-09	0.898727	B4GALT6	Intergenic (nearest gene 703 bp away)	1.68E-05
chr18	29265491	-0.252214	0.0348981	1.6e-09	0.896586	B4GALT6	Intergenic (nearest gene 805 bp away)	1.68E-05
chr18	29265383	-0.251766	0.0348497	1.62e-09	0.898869	B4GALT6	Intergenic (nearest gene 697 bp away)	1.68E-05
chr18	29265380	-0.251724	0.0348515	1.63e-09	0.89894	B4GALT6	Intergenic (nearest gene 694 bp away)	1.68e-05
chr17	30846602	-0.343746	0.0475933	1.63e-09	0.890553	MYO1D	Intron	1.68E-05
chr11	91959062	-0.344857	0.0477594	1.64e-09	0.825053	FAT3	Intergenic (nearest gene 126199 bp away)	1.68E-05
chr18	29265374	-0.251636	0.0348553	1.65e-09	0.899084	B4GALT6	Intergenic (nearest gene 688 bp away)	1.68E-05
chr18	29265363	-0.251461	0.0348636	1.69e-09	0.89935	B4GALT6	Intergenic (nearest gene 677 bp away)	1.68E-05
chr18	29265361	-0.251427	0.0348652	1.7e-09	0.899399	B4GALT6	Intergenic (nearest gene 675 bp away)	1.68E-05
chr18	29265517	-0.251958	0.0349456	1.71e-09	0.896139	B4GALT6	Intergenic (nearest gene 831 bp away)	1.68E-05
chr18	29265519	-0.251931	0.0349499	1.72e-09	0.896107	B4GALT6	Intergenic (nearest gene 833 bp away)	1.68E-05
chr11	91958403	-0.364862	0.050638	1.74e-09	0.867479	FAT3	Intergenic (nearest gene 126858 bp away)	1.68E-05
chr18	29265352	-0.25127	0.0348731	1.74e-09	0.89962	B4GALT6	Intergenic (nearest gene 666 bp away)	1.68E-05
chr11	91959082	-0.345012	0.0479254	1.78e-09	0.82528	FAT3	Intergenic (nearest gene 126179 bp away)	1.68E-05
chr11	91958396	-0.364806	0.0506772	1.78e-09	0.868173	FAT3	Intergenic (nearest gene 126865 bp away)	1.68E-05
chr18	29265342	-0.251084	0.0348827	1.79e-09	0.899866	B4GALT6	Intergenic (nearest gene 656 bp away)	1.68E-05
chr11	91958394	-0.364787	0.0506882	1.8e-09	0.868372	FAT3	Intergenic (nearest gene 126867 bp away)	1.68E-05
chr18	29265338	-0.251007	0.0348867	1.81e-09	0.899965	B4GALT6	Intergenic (nearest gene 652 bp away)	1.68E-05
chr11	91959086	-0.345045	0.0479611	1.81e-09	0.825339	FAT3	Intergenic (nearest gene 126175 bp away)	1.68E-05
chr18	29265538	-0.251613	0.0349954	1.84e-09	0.895811	B4GALT6	Intergenic (nearest gene 852 bp away)	1.69E-05
chr11	91958385	-0.364682	0.0507369	1.86e-09	0.869267	FAT3	Intergenic (nearest gene 126876 bp away)	1.69E-05
chr18	29265540	-0.251572	0.0350008	1.86e-09	0.895782	B4GALT6	Intergenic (nearest gene 854 bp away)	1.69E-05
chr17	30846608	-0.342007	0.0475921	1.87e-09	0.890828	MYO1D	Intron	1.69E-05
chr18	29265544	-0.251488	0.0350117	1.89e-09	0.895724	B4GALT6	Intergenic (nearest gene 858 bp away)	1.70E-05
chr18	29265547	-0.251421	0.0350202	1.92e-09	0.895681	B4GALT6	Intergenic (nearest gene 861 bp away)	1.70E-05
chr18	29265318	-0.250591	0.0349082	1.92e-09	0.900462	B4GALT6	Intergenic (nearest gene 632 bp away)	1.70E-05
chr18	29265316	-0.250546	0.0349105	1.94e-09	0.900512	B4GALT6	Intergenic (nearest gene 630 bp away)	1.71E-05
chr18	29265552	-0.251302	0.0350349	1.96e-09	0.895612	B4GALT6	Intergenic (nearest gene 866 bp away)	1.72E-05
chr18	29265310	-0.250411	0.0349174	1.97e-09	0.900661	B4GALT6	Intergenic (nearest gene 624 bp away)	1.72E-05
chr18	29265307	-0.250342	0.034921	2e-09	0.900736	B4GALT6	Intergenic (nearest gene 621 bp away)	1.73E-05
chr18	29265304	-0.250272	0.0349245	2.02e-09	0.900811	B4GALT6	Intergenic (nearest gene 618 bp away)	1.74E-05
chr18	29265300	-0.250177	0.0349293	2.04e-09	0.900911	B4GALT6	Intergenic (nearest gene 614 bp away)	1.75E-05
chr11	91958359	-0.364217	0.0508685	2.06e-09	0.871872	FAT3	Intergenic (nearest gene 126902 bp away)	1.75E-05
chr19	33819897	0.200732	0.0280617	2.12e-09	0.0205691	CEBPA-AS1	Intergenic (nearest gene 23934 bp away)	1.76E-05
chr19	33819901	0.201059	0.0281075	2.12e-09	0.020592	CEBPA-AS1	Intergenic (nearest gene 23938 bp away)	1.76E-05
chr19	33819854	0.196992	0.0275397	2.12e-09	0.0203258	CEBPA-AS1	Intergenic (nearest gene 23891 bp away)	1.76E-05
chr19	33819832	0.194923	0.0272521	2.12e-09	0.0202033	CEBPA-AS1	Intergenic (nearest gene 23869 bp away)	1.76E-05
chr18	29265285	-0.249803	0.0349477	2.16e-09	0.901285	B4GALT6	Intergenic (nearest gene 599 bp away)	1.77E-05
chr11	91959123	-0.345334	0.048322	2.17e-09	0.826065	FAT3	Intergenic (nearest gene 126138 bp away)	1.77E-05
chr11	91959125	-0.345347	0.0483429	2.19e-09	0.826113	FAT3	Intergenic (nearest gene 126136 bp away)	1.78E-05
chr11	91958324	-0.363201	0.0510228	2.41e-09	0.875409	FAT3	Intergenic (nearest gene 126937 bp away)	1.87E-05
chr11	91958317	-0.362944	0.0510504	2.5e-09	0.876119	FAT3	Intergenic (nearest gene 126944 bp away)	1.89E-05
chr11	91959149	-0.345467	0.0486013	2.51e-09	0.826748	FAT3	Intergenic (nearest gene 126112 bp away)	1.89E-05
chr11	91958309	-0.362629	0.0510804	2.59e-09	0.876932	FAT3	Intergenic (nearest gene 126952 bp away)	1.90E-05
chr18	29265595	-0.249807	0.0351997	2.62e-09	0.895118	B4GALT6	Intergenic (nearest gene 909 bp away)	1.90E-05
chr11	91958304	-0.36242	0.0510984	2.66e-09	0.877441	FAT3	Intergenic (nearest gene 126957 bp away)	1.90E-05
chr11	91959164	-0.345499	0.0487685	2.74e-09	0.827194	FAT3	Intergenic (nearest gene 126097 bp away)	1.96E-05
chr11	91958295	-0.362022	0.0511292	2.78e-09	0.878357	FAT3	Intergenic (nearest gene 126966 bp away)	1.97E-05
chr18	29265604	-0.24936	0.0352457	2.84e-09	0.895042	B4GALT6	Intergenic (nearest gene 918 bp away)	2.00E-05
chr17	30846627	-0.336383	0.0475773	2.89e-09	0.891667	MYO1D	Intron	2.01E-05
chr18	29265606	-0.249254	0.0352565	2.9e-09	0.895026	B4GALT6	Intergenic (nearest gene 920 bp away)	2.01E-05
chr11	91959175	-0.345496	0.0488928	2.94e-09	0.827542	FAT3	Intergenic (nearest gene 126086 bp away)	2.02E-05
chr11	91958279	-0.361244	0.0511792	3.03e-09	0.879987	FAT3	Intergenic (nearest gene 126982 bp away)	2.04E-05
chr11	91959181	-0.345485	0.048961	3.05e-09	0.827739	FAT3	Intergenic (nearest gene 126080 bp away)	2.04E-05
chr18	29265202	-0.247278	0.0350505	3.07e-09	0.903307	B4GALT6	Intergenic (nearest gene 516 bp away)	2.05E-05
chr18	29265613	-0.24886	0.0352966	3.12e-09	0.894974	B4GALT6	Intergenic (nearest gene 927 bp away)	2.07E-05
chr18	29265198	-0.247137	0.0350552	3.12e-09	0.9034	B4GALT6	Intergenic (nearest gene 512 bp away)	2.07E-05
chr18	29265196	-0.247066	0.0350575	3.15e-09	0.903447	B4GALT6	Intergenic (nearest gene 510 bp away)	2.07E-05
chr18	29265194	-0.246995	0.0350598	3.18e-09	0.903493	B4GALT6	Intergenic (nearest gene 508 bp away)	2.07E-05
chr18	29265615	-0.248741	0.0353086	3.19e-09	0.894959	B4GALT6	Intergenic (nearest gene 929 bp away)	2.07E-05
chr18	29265191	-0.246887	0.0350632	3.23e-09	0.903563	B4GALT6	Intergenic (nearest gene 505 bp away)	2.07E-05
chr18	29265182	-0.246559	0.0350734	3.37e-09	0.903769	B4GALT6	Intergenic (nearest gene 496 bp away)	2.07E-05
chr11	91959199	-0.34541	0.0491661	3.43e-09	0.828353	FAT3	Intergenic (nearest gene 126062 bp away)	2.07E-05
chr16	148351	0.354302	0.0504495	3.46e-09	0.053154	NPRL3	Intron	2.07E-05
chr18	29265176	-0.246336	0.03508	3.47e-09	0.903906	B4GALT6	Intergenic (nearest gene 490 bp away)	2.07E-05
chr17	30846635	-0.333968	0.0475662	3.48e-09	0.892008	MYO1D	Intron	2.07E-05
chr16	148385	0.352645	0.0502824	3.59e-09	0.0539687	NPRL3	Intron	2.12E-05
chr18	29265168	-0.246033	0.0350886	3.61e-09	0.904085	B4GALT6	Intergenic (nearest gene 482 bp away)	2.13E-05
chr17	30846639	-0.332751	0.0475597	3.82e-09	0.892176	MYO1D	Intron	2.25E-05
chr16	148419	0.34933	0.0499614	3.89e-09	0.0549543	NPRL3	Intron	2.27E-05
chr11	91959218	-0.345261	0.0493814	3.89e-09	0.829035	FAT3	Intergenic (nearest gene 126043 bp away)	2.27E-05
chr18	29265149	-0.245289	0.0351085	3.97e-09	0.904501	B4GALT6	Intergenic (nearest gene 463 bp away)	2.30E-05
chr11	91959222	-0.34522	0.0494264	4e-09	0.829182	FAT3	Intergenic (nearest gene 126039 bp away)	2.31E-05
chr10	1102503	-0.145601	0.0208506	4.02e-09	0.864289	IDI1	3_UTR	2.32E-05
chr18	29265146	-0.245168	0.0351116	4.03e-09	0.904565	B4GALT6	Intergenic (nearest gene 460 bp away)	2.32E-05
chr18	29265635	-0.247393	0.0354451	4.07e-09	0.894834	B4GALT6	Intergenic (nearest gene 949 bp away)	2.34E-05
chr18	29265142	-0.245006	0.0351158	4.11e-09	0.90465	B4GALT6	Intergenic (nearest gene 456 bp away)	2.35E-05
chr11	91959227	-0.345165	0.0494823	4.14e-09	0.829367	FAT3	Intergenic (nearest gene 126034 bp away)	2.35E-05
chr10	1102516	-0.145529	0.0208647	4.15e-09	0.864447	IDI1	3_UTR	2.35E-05
chr18	29265637	-0.247242	0.0354605	4.19e-09	0.894824	B4GALT6	Intergenic (nearest gene 951 bp away)	2.36E-05
chr17	30846643	-0.331529	0.0475525	4.19e-09	0.892342	MYO1D	Intron	2.36E-05
chr10	1102523	-0.145489	0.0208723	4.22e-09	0.864532	IDI1	3_UTR	2.37E-05
chr11	91959232	-0.345105	0.0495379	4.28e-09	0.829554	FAT3	Intergenic (nearest gene 126029 bp away)	2.39E-05
chr10	1102536	-0.145416	0.0208866	4.35e-09	0.864688	IDI1	3_UTR	2.42E-05
chr10	1102538	-0.145405	0.0208888	4.37e-09	0.864712	IDI1	3_UTR	2.43E-05
chr17	30846645	-0.330916	0.0475486	4.39e-09	0.892424	MYO1D	Intron	2.43E-05
chr10	1102543	-0.145377	0.0208943	4.42e-09	0.864773	IDI1	3_UTR	2.44E-05
chr10	1102547	-0.145354	0.0208988	4.47e-09	0.864821	IDI1	3_UTR	2.45E-05
chr18	29265642	-0.24685	0.0355004	4.5e-09	0.894797	B4GALT6	Intergenic (nearest gene 956 bp away)	2.45E-05
chr10	1102550	-0.145337	0.0209021	4.5e-09	0.864857	IDI1	3_UTR	2.45E-05
chr11	91958205	-0.356555	0.0513266	4.61e-09	0.887511	FAT3	Intergenic (nearest gene 127056 bp away)	2.51E-05
chr16	148457	0.342304	0.0493246	4.73e-09	0.0563212	NPRL3	Intron	2.56E-05
chr18	29265115	-0.243876	0.0351439	4.74e-09	0.905201	B4GALT6	Intergenic (nearest gene 429 bp away)	2.56E-05
chr18	29265110	-0.24366	0.0351491	4.87e-09	0.905298	B4GALT6	Intergenic (nearest gene 424 bp away)	2.62E-05
chr18	29265107	-0.243529	0.0351523	4.95e-09	0.905356	B4GALT6	Intergenic (nearest gene 421 bp away)	2.65E-05
chr11	91958193	-0.355642	0.0513377	4.96e-09	0.888723	FAT3	Intergenic (nearest gene 127068 bp away)	2.65E-05
chr18	29265649	-0.246265	0.0355607	5e-09	0.894763	B4GALT6	Intergenic (nearest gene 963 bp away)	2.67E-05
chr11	91958191	-0.355486	0.0513392	5.02e-09	0.888924	FAT3	Intergenic (nearest gene 127070 bp away)	2.67E-05
chr16	148466	0.339919	0.0491216	5.1e-09	0.0566947	NPRL3	Intron	2.70E-05
chr10	1102609	-0.145	0.0209695	5.2e-09	0.86556	IDI1	3_UTR	2.74E-05
chr10	1102611	-0.144989	0.0209718	5.23e-09	0.865584	IDI1	3_UTR	2.74E-05
chr17	30846653	-0.32845	0.0475316	5.29e-09	0.892749	MYO1D	Intron	2.77E-05
chr11	91958181	-0.354692	0.0513454	5.34e-09	0.889931	FAT3	Intergenic (nearest gene 127080 bp away)	2.78E-05
chr10	1102624	-0.144914	0.020987	5.4e-09	0.865738	IDI1	3_UTR	2.81E-05
chr10	1102632	-0.144867	0.0209965	5.51e-09	0.865832	IDI1	3_UTR	2.85E-05
chr11	91958174	-0.354121	0.0513483	5.57e-09	0.890634	FAT3	Intergenic (nearest gene 127087 bp away)	2.87E-05
chr10	1102637	-0.144838	0.0210024	5.58e-09	0.865891	IDI1	3_UTR	2.87E-05
chr18	29265084	-0.242543	0.0351743	5.6e-09	0.905762	B4GALT6	Intergenic (nearest gene 398 bp away)	2.87E-05
chr18	29265082	-0.242459	0.035176	5.65e-09	0.905794	B4GALT6	Intergenic (nearest gene 396 bp away)	2.89E-05
chr10	1102644	-0.144798	0.0210107	5.68e-09	0.865973	IDI1	3_UTR	2.89E-05
chr11	91958170	-0.35379	0.0513494	5.71e-09	0.891035	FAT3	Intergenic (nearest gene 127091 bp away)	2.90E-05
chr18	29265079	-0.242333	0.0351784	5.74e-09	0.905842	B4GALT6	Intergenic (nearest gene 393 bp away)	2.91E-05
chr18	29265075	-0.242167	0.0351816	5.86e-09	0.905904	B4GALT6	Intergenic (nearest gene 389 bp away)	2.96E-05
chr11	91958165	-0.353371	0.0513504	5.9e-09	0.891535	FAT3	Intergenic (nearest gene 127096 bp away)	2.97E-05
chr18	29265073	-0.242084	0.0351831	5.92e-09	0.905934	B4GALT6	Intergenic (nearest gene 387 bp away)	2.97E-05
chr17	30846658	-0.326899	0.0475197	5.95e-09	0.892948	MYO1D	Intron	2.98E-05
chr11	91958162	-0.353117	0.0513506	6.01e-09	0.891835	FAT3	Intergenic (nearest gene 127099 bp away)	3.00E-05
chr18	29265068	-0.241878	0.0351867	6.06e-09	0.906007	B4GALT6	Intergenic (nearest gene 382 bp away)	3.00E-05
chr6	20891926	0.150942	0.0219588	6.07e-09	0.0657041	CDKAL1	Intron	3.00E-05
chr6	20891914	0.15097	0.0219641	6.08e-09	0.0657035	CDKAL1	Intron	3.00E-05
chr6	20891890	0.151026	0.0219746	6.1e-09	0.0657022	CDKAL1	Intron	3.00E-05
chr6	20891868	0.151077	0.0219843	6.11e-09	0.0657011	CDKAL1	Intron	3.00E-05
chr6	20891858	0.151101	0.0219887	6.12e-09	0.0657005	CDKAL1	Intron	3.00E-05
chr11	91958159	-0.35286	0.0513507	6.12e-09	0.892135	FAT3	Intergenic (nearest gene 127102 bp away)	3.00E-05
chr18	29265065	-0.241756	0.0351888	6.15e-09	0.906049	B4GALT6	Intergenic (nearest gene 379 bp away)	3.01E-05
chr11	91958156	-0.352602	0.0513506	6.24e-09	0.892434	FAT3	Intergenic (nearest gene 127105 bp away)	3.05E-05
chr11	91958153	-0.352342	0.0513503	6.36e-09	0.892733	FAT3	Intergenic (nearest gene 127108 bp away)	3.08E-05
chr18	29265058	-0.241473	0.0351933	6.36e-09	0.906143	B4GALT6	Intergenic (nearest gene 372 bp away)	3.08E-05
chr17	30846661	-0.325966	0.0475121	6.38e-09	0.893066	MYO1D	Intron	3.08E-05
chr18	29265055	-0.241353	0.0351951	6.45e-09	0.906182	B4GALT6	Intergenic (nearest gene 369 bp away)	3.11E-05
chr11	91958150	-0.35208	0.0513498	6.48e-09	0.893032	FAT3	Intergenic (nearest gene 127111 bp away)	3.12E-05
chr18	29265053	-0.241274	0.0351963	6.52e-09	0.906207	B4GALT6	Intergenic (nearest gene 367 bp away)	3.12E-05
chr11	91958147	-0.351816	0.0513491	6.6e-09	0.89333	FAT3	Intergenic (nearest gene 127114 bp away)	3.16E-05
chr17	30846664	-0.325029	0.0475042	6.84e-09	0.893183	MYO1D	Intron	3.26E-05
chr18	29265040	-0.240766	0.0352034	6.92e-09	0.906356	B4GALT6	Intergenic (nearest gene 354 bp away)	3.29E-05
chr11	91958139	-0.351104	0.0513462	6.95e-09	0.894123	FAT3	Intergenic (nearest gene 127122 bp away)	3.30E-05
chr18	29265035	-0.240572	0.0352061	7.07e-09	0.906407	B4GALT6	Intergenic (nearest gene 349 bp away)	3.34E-05
chr11	91958133	-0.350562	0.0513432	7.22e-09	0.894717	FAT3	Intergenic (nearest gene 127128 bp away)	3.40E-05
chr10	1102744	-0.144211	0.0211337	7.33e-09	0.867132	WDR37	Intergenic (nearest gene 31 bp away)	3.45E-05
chr18	29265026	-0.240224	0.0352112	7.37e-09	0.906488	B4GALT6	Intergenic (nearest gene 340 bp away)	3.46E-05
chr18	29265022	-0.24007	0.0352137	7.51e-09	0.90652	B4GALT6	Intergenic (nearest gene 336 bp away)	3.48E-05
chr15	85291689	-0.239383	0.0351173	7.53e-09	0.917334	ZNF592	Intergenic (nearest gene 128 bp away)	3.48E-05
chr15	85291671	-0.239333	0.0351161	7.56e-09	0.917389	ZNF592	Intergenic (nearest gene 146 bp away)	3.48E-05
chr10	1102758	-0.144128	0.0211514	7.6e-09	0.867292	WDR37	Intergenic (nearest gene 17 bp away)	3.48E-05
chr6	20875446	0.197516	0.0289906	7.63e-09	0.0631401	CDKAL1	Intron	3.48E-05
chr15	85291749	-0.238758	0.0350491	7.66e-09	0.917211	ZNF592	Intergenic (nearest gene 68 bp away)	3.48E-05
chr7	99156782	-0.354613	0.052057	7.66e-09	0.850003	ZNF655	Intron	3.48E-05
chr6	20875422	0.197702	0.0290235	7.67e-09	0.0631124	CDKAL1	Intron	3.48E-05
chr15	85291752	-0.238695	0.0350422	7.67e-09	0.917209	ZNF592	Intergenic (nearest gene 65 bp away)	3.48E-05
chr7	99156762	-0.355052	0.0521249	7.68e-09	0.850382	ZNF655	Intron	3.48E-05
chr7	99156745	-0.355383	0.0521806	7.7e-09	0.8507	ZNF655	Intron	3.48E-05
chr15	85291760	-0.238513	0.035022	7.71e-09	0.917205	ZNF592	Intergenic (nearest gene 57 bp away)	3.48E-05
chr7	99156831	-0.353302	0.0518796	7.72e-09	0.849051	ZNF655	Intron	3.48E-05
chr7	44349669	-0.297189	0.0436404	7.72e-09	0.889906	CAMK2B	Intron	3.48E-05
chr7	99156836	-0.353149	0.0518606	7.73e-09	0.848953	ZNF655	Intron	3.48E-05
chr15	85291767	-0.238336	0.0350022	7.75e-09	0.917204	ZNF592	Intergenic (nearest gene 50 bp away)	3.48E-05
chr15	85291773	-0.238169	0.0349837	7.78e-09	0.917205	ZNF592	Intergenic (nearest gene 44 bp away)	3.48E-05
chr7	99156851	-0.352669	0.0518027	7.78e-09	0.848654	ZNF655	Intron	3.48E-05
chr7	99156712	-0.355915	0.0522834	7.8e-09	0.851308	ZNF655	Intron	3.48E-05
chr7	99156709	-0.355956	0.0522923	7.81e-09	0.851362	ZNF655	Intron	3.48E-05
chr15	85291778	-0.238021	0.0349672	7.81e-09	0.917208	ZNF592	Intergenic (nearest gene 39 bp away)	3.48E-05
chr15	85291784	-0.237831	0.0349459	7.85e-09	0.917213	ZNF592	Intergenic (nearest gene 33 bp away)	3.48E-05
chr7	99156868	-0.352084	0.0517354	7.85e-09	0.848312	ZNF655	Intron	3.48E-05
chr15	85291790	-0.237627	0.0349231	7.89e-09	0.917219	ZNF592	Intergenic (nearest gene 27 bp away)	3.48E-05
chr15	85291628	-0.238744	0.0350884	7.9e-09	0.917526	ZNF592	Intergenic (nearest gene 189 bp away)	3.48E-05
chr11	91958119	-0.349273	0.0513333	7.9e-09	0.896095	FAT3	Intergenic (nearest gene 127142 bp away)	3.48E-05
chr18	29265010	-0.239612	0.0352217	7.93e-09	0.906597	B4GALT6	Intergenic (nearest gene 324 bp away)	3.48E-05
chr7	44349663	-0.296995	0.0436584	7.94e-09	0.889835	CAMK2B	Intron	3.48E-05
chr15	85291798	-0.237336	0.0348903	7.95e-09	0.917232	ZNF592	Intergenic (nearest gene 19 bp away)	3.48E-05
chr15	85291802	-0.237182	0.0348728	7.98e-09	0.91724	ZNF592	Intergenic (nearest gene 15 bp away)	3.48E-05
chr15	85291620	-0.238562	0.0350807	8.01e-09	0.91755	ZNF592	Intergenic (nearest gene 197 bp away)	3.48E-05
chr15	85291808	-0.236939	0.0348453	8.03e-09	0.917253	ZNF592	Intergenic (nearest gene 9 bp away)	3.48E-05
chr15	85291811	-0.236813	0.0348309	8.05e-09	0.917261	ZNF592	Intergenic (nearest gene 6 bp away)	3.48E-05
chr10	1102780	-0.143997	0.0211796	8.05e-09	0.867542	WDR37	5_UTR	3.48E-05
chr15	85291814	-0.236683	0.0348161	8.08e-09	0.917269	ZNF592	Intergenic (nearest gene 3 bp away)	3.49E-05
chr10	1102782	-0.143985	0.0211822	8.1e-09	0.867565	WDR37	5_UTR	3.49E-05
chr15	85291613	-0.238383	0.0350738	8.12e-09	0.91757	ZNF592	Intergenic (nearest gene 204 bp away)	3.49E-05
chr18	29265004	-0.239385	0.0352262	8.15e-09	0.906626	B4GALT6	Intergenic (nearest gene 318 bp away)	3.49E-05
chr7	44349656	-0.296739	0.0436805	8.22e-09	0.889747	CAMK2B	Intron	3.49E-05
chr7	99156634	-0.356619	0.0524975	8.23e-09	0.852689	ZNF655	5_UTR	3.49E-05
chr15	85291831	-0.235884	0.0347245	8.23e-09	0.917328	ZNF592	5_UTR	3.49E-05
chr15	85291606	-0.238187	0.0350667	8.25e-09	0.917589	ZNF592	Intergenic (nearest gene 211 bp away)	3.49E-05
chr10	1102790	-0.143937	0.0211925	8.27e-09	0.867655	WDR37	5_UTR	3.49E-05
chr15	85291837	-0.235576	0.0346889	8.29e-09	0.917353	ZNF592	5_UTR	3.49E-05
chr15	85291840	-0.235416	0.0346705	8.32e-09	0.917367	ZNF592	5_UTR	3.49E-05
chr7	99156622	-0.356661	0.052527	8.32e-09	0.852895	ZNF655	5_UTR	3.49E-05
chr15	85291602	-0.238066	0.0350627	8.34e-09	0.917599	ZNF592	Intergenic (nearest gene 215 bp away)	3.49E-05
chr7	99156618	-0.356671	0.0525366	8.36e-09	0.852964	ZNF655	5_UTR	3.49E-05
chr7	99156615	-0.356678	0.0525437	8.38e-09	0.853015	ZNF655	5_UTR	3.49E-05
chr7	44349652	-0.296579	0.0436938	8.4e-09	0.889696	CAMK2B	Intron	3.49E-05
chr15	85291849	-0.234917	0.0346126	8.42e-09	0.917412	ZNF592	5_UTR	3.49E-05
chr15	85291851	-0.234801	0.0345992	8.44e-09	0.917422	ZNF592	5_UTR	3.49E-05
chr15	85291597	-0.237906	0.0350579	8.45e-09	0.917611	ZNF592	Intergenic (nearest gene 220 bp away)	3.49E-05
chr15	85291853	-0.234684	0.0345856	8.47e-09	0.917433	ZNF592	5_UTR	3.49E-05
chr7	99156605	-0.356692	0.0525671	8.47e-09	0.853185	ZNF655	5_UTR	3.49E-05
chr15	85291855	-0.234566	0.0345718	8.49e-09	0.917445	ZNF592	5_UTR	3.49E-05
chr7	99156602	-0.356694	0.052574	8.5e-09	0.853235	ZNF655	5_UTR	3.49E-05
chr15	85291859	-0.234324	0.0345436	8.54e-09	0.917468	ZNF592	5_UTR	3.49E-05
chr18	29264994	-0.239006	0.035235	8.54e-09	0.906658	B4GALT6	Intergenic (nearest gene 308 bp away)	3.49E-05
chr7	99156593	-0.356694	0.0525943	8.58e-09	0.853387	ZNF655	5_UTR	3.50E-05
chr18	29264992	-0.23893	0.035237	8.62e-09	0.906662	B4GALT6	Intergenic (nearest gene 306 bp away)	3.50E-05
chr15	85291590	-0.237666	0.0350514	8.63e-09	0.917626	ZNF592	Intergenic (nearest gene 227 bp away)	3.50E-05
chr7	99156588	-0.356691	0.0526054	8.63e-09	0.85347	ZNF655	5_UTR	3.50E-05
chr7	99156586	-0.356688	0.0526098	8.65e-09	0.853504	ZNF655	5_UTR	3.50E-05
chr15	85291588	-0.237595	0.0350496	8.69e-09	0.91763	ZNF592	Intergenic (nearest gene 229 bp away)	3.50E-05
chr7	44349646	-0.296319	0.0437143	8.69e-09	0.889615	CAMK2B	Intron	3.50E-05
chr15	85291585	-0.237484	0.035047	8.77e-09	0.917636	ZNF592	Intergenic (nearest gene 232 bp away)	3.52E-05
chr15	85291878	-0.233087	0.034399	8.78e-09	0.917598	ZNF592	5_UTR	3.52E-05
chr7	44349644	-0.296228	0.0437213	8.8e-09	0.889588	CAMK2B	Intron	3.52E-05
chr15	85291881	-0.232879	0.0343745	8.82e-09	0.917621	ZNF592	5_UTR	3.52E-05
chr15	85291884	-0.232666	0.0343495	8.86e-09	0.917644	ZNF592	5_UTR	3.53E-05
chr15	85291887	-0.23245	0.0343241	8.9e-09	0.917669	ZNF592	5_UTR	3.53E-05
chr7	44349642	-0.296133	0.0437283	8.91e-09	0.88956	CAMK2B	Intron	3.53E-05
chr15	85291890	-0.23223	0.0342982	8.95e-09	0.917694	ZNF592	5_UTR	3.54E-05
chr18	29264984	-0.238627	0.0352458	8.97e-09	0.906669	B4GALT6	Intergenic (nearest gene 298 bp away)	3.54E-05
chr11	91958099	-0.347376	0.0513124	8.98e-09	0.898048	FAT3	Intergenic (nearest gene 127162 bp away)	3.54E-05
chr15	85291577	-0.23717	0.0350407	9.03e-09	0.917649	ZNF592	Intergenic (nearest gene 240 bp away)	3.55E-05
chr18	29264982	-0.238551	0.0352484	9.06e-09	0.906669	B4GALT6	Intergenic (nearest gene 296 bp away)	3.55E-05
chr7	99156545	-0.356545	0.0526945	9.11e-09	0.854178	ZNF655	5_UTR	3.55E-05
chr10	1102827	-0.143715	0.0212408	9.11e-09	0.868071	WDR37	5_UTR	3.55E-05
chr15	85291901	-0.23139	0.0341994	9.12e-09	0.917792	ZNF592	Intron	3.55E-05
chr15	85291574	-0.237046	0.0350386	9.14e-09	0.917653	ZNF592	Intergenic (nearest gene 243 bp away)	3.55E-05
chr18	29264980	-0.238475	0.035251	9.15e-09	0.906668	B4GALT6	Intergenic (nearest gene 294 bp away)	3.55E-05
chr7	99156539	-0.356509	0.0527061	9.18e-09	0.854275	ZNF655	5_UTR	3.56E-05
chr15	85291908	-0.230829	0.0341332	9.23e-09	0.91786	ZNF592	Intron	3.57E-05
chr15	85291571	-0.236917	0.0350367	9.25e-09	0.917657	ZNF592	Intergenic (nearest gene 246 bp away)	3.57E-05
chr15	85291910	-0.230665	0.0341138	9.27e-09	0.91788	ZNF592	Intron	3.57E-05
chr10	1102835	-0.143667	0.0212514	9.31e-09	0.86816	WDR37	5_UTR	3.58E-05
chr15	85291915	-0.230246	0.0340644	9.35e-09	0.917932	ZNF592	Intron	3.58E-05
chr10	1102837	-0.143655	0.021254	9.36e-09	0.868182	WDR37	5_UTR	3.58E-05
chr15	85291568	-0.236785	0.0350351	9.38e-09	0.91766	ZNF592	Intergenic (nearest gene 249 bp away)	3.58E-05
chr18	29264975	-0.238284	0.0352584	9.39e-09	0.906658	B4GALT6	Intergenic (nearest gene 289 bp away)	3.58E-05
chr11	91959355	-0.342694	0.0507123	9.41e-09	0.834193	FAT3	Intergenic (nearest gene 125906 bp away)	3.58E-05
chr10	1102840	-0.143637	0.021258	9.43e-09	0.868216	WDR37	5_UTR	3.59E-05
chr18	29264973	-0.238208	0.0352617	9.49e-09	0.906652	B4GALT6	Intergenic (nearest gene 287 bp away)	3.60E-05
chr15	85291565	-0.236648	0.0350337	9.5e-09	0.917663	ZNF592	Intergenic (nearest gene 252 bp away)	3.60E-05
chr18	29264971	-0.238131	0.0352653	9.59e-09	0.906644	B4GALT6	Intergenic (nearest gene 285 bp away)	3.62E-05
chr15	85291562	-0.236507	0.0350325	9.64e-09	0.917665	ZNF592	Intergenic (nearest gene 255 bp away)	3.63E-05
chr15	85291559	-0.236362	0.0350317	9.79e-09	0.917667	ZNF592	Intergenic (nearest gene 258 bp away)	3.68E-05
chr7	99156492	-0.356103	0.0527895	9.84e-09	0.855023	ZNF655	5_UTR	3.68E-05
chr10	1102856	-0.143541	0.0212793	9.84e-09	0.868394	WDR37	5_UTR	3.68E-05
chr7	99156488	-0.356058	0.052796	9.9e-09	0.855085	ZNF655	5_UTR	3.69E-05
chr16	148510	0.322852	0.047874	9.91e-09	0.0588558	NPRL3	Intron	3.69E-05
chr15	85291556	-0.236212	0.0350312	9.94e-09	0.917667	ZNF592	Intergenic (nearest gene 261 bp away)	3.69E-05
chr7	99156485	-0.356024	0.0528009	9.95e-09	0.855132	ZNF655	5_UTR	3.69E-05
chr10	1102861	-0.14351	0.021286	9.98e-09	0.868449	WDR37	5_UTR	3.70E-05
chr10	1102863	-0.143498	0.0212886	1e-08	0.868471	WDR37	5_UTR	3.71E-05
chr11	91959368	-0.342433	0.0508071	1.01e-08	0.834642	FAT3	Intergenic (nearest gene 125893 bp away)	3.71E-05
chr18	29264962	-0.237777	0.0352849	1.01e-08	0.906587	B4GALT6	Intergenic (nearest gene 276 bp away)	3.72E-05
chr15	85291553	-0.236056	0.0350312	1.01e-08	0.917667	ZNF592	Intergenic (nearest gene 264 bp away)	3.72E-05
chr7	99156469	-0.355826	0.0528259	1.02e-08	0.85538	ZNF655	5_UTR	3.75E-05
chr11	91958078	-0.345328	0.0512825	1.03e-08	0.900076	FAT3	Intergenic (nearest gene 127183 bp away)	3.77E-05
chr17	30846682	-0.319369	0.0474502	1.04e-08	0.893865	MYO1D	Intron	3.81E-05
chr10	1102879	-0.143402	0.0213101	1.05e-08	0.868648	WDR37	5_UTR	3.82E-05
chr18	29264956	-0.237528	0.0353028	1.05e-08	0.906531	B4GALT6	Intergenic (nearest gene 270 bp away)	3.82E-05
chr7	99156443	-0.355454	0.0528635	1.07e-08	0.855777	ZNF655	Intron	3.86E-05
chr15	85291544	-0.235556	0.035034	1.07e-08	0.917663	ZNF592	Intergenic (nearest gene 273 bp away)	3.86E-05
chr10	1102888	-0.143347	0.0213223	1.07e-08	0.868746	WDR37	5_UTR	3.87E-05
chr7	99156438	-0.355375	0.0528704	1.08e-08	0.855852	ZNF655	Intron	3.88E-05
chr10	1102892	-0.143323	0.0213277	1.08e-08	0.86879	WDR37	5_UTR	3.89E-05
chr7	44349614	-0.294546	0.0438339	1.09e-08	0.889132	CAMK2B	Intron	3.89E-05
chr7	99156427	-0.355195	0.052885	1.1e-08	0.856017	ZNF655	Intron	3.93E-05
chr15	85291539	-0.235256	0.0350375	1.11e-08	0.917657	ZNF592	Intergenic (nearest gene 278 bp away)	3.95E-05
chr7	99156420	-0.355074	0.052894	1.11e-08	0.856122	ZNF655	Intron	3.97E-05
chr11	91958063	-0.343835	0.0512566	1.13e-08	0.901508	FAT3	Intergenic (nearest gene 127198 bp away)	4.02E-05
chr11	91959395	-0.34197	0.0509829	1.14e-08	0.835515	FAT3	Intergenic (nearest gene 125866 bp away)	4.02E-05
chr7	99156409	-0.354877	0.0529076	1.14e-08	0.856285	ZNF655	Exonic_Splice.5_UTR	4.02E-05
chr7	44349608	-0.29414	0.0438577	1.14e-08	0.889031	CAMK2B	Intron	4.03E-05
chr15	85291534	-0.234938	0.0350425	1.15e-08	0.917649	ZNF592	Intergenic (nearest gene 283 bp away)	4.05E-05
chr10	1102917	-0.143171	0.0213617	1.16e-08	0.869063	WDR37	Intron	4.08E-05
chr7	99156397	-0.35465	0.0529217	1.16e-08	0.856462	ZNF655	5_UTR	4.08E-05
chr15	85292005	-0.220769	0.0329479	1.17e-08	0.919222	ZNF592	Intron	4.09E-05
chr15	85291532	-0.234806	0.035045	1.17e-08	0.917646	ZNF592	Intergenic (nearest gene 285 bp away)	4.09E-05
chr7	99156387	-0.354452	0.052933	1.19e-08	0.856608	ZNF655	5_UTR	4.14E-05
chr15	85291529	-0.234603	0.0350492	1.2e-08	0.917639	ZNF592	Intergenic (nearest gene 288 bp away)	4.17E-05
chr7	44349602	-0.293712	0.0438818	1.2e-08	0.888927	CAMK2B	Intron	4.17E-05
chr11	91959416	-0.341712	0.0511	1.23e-08	0.836132	FAT3	Intergenic (nearest gene 125845 bp away)	4.20E-05
chr10	1102939	-0.143037	0.0213919	1.23e-08	0.869302	WDR37	Intron	4.20E-05
chr15	85292021	-0.218675	0.0327044	1.23e-08	0.919521	ZNF592	Intron	4.20E-05
chr10	1102942	-0.143019	0.021396	1.24e-08	0.869334	WDR37	Intron	4.22E-05
chr7	99156364	-0.353965	0.0529571	1.24e-08	0.85694	ZNF655	5_UTR	4.22E-05
chr7	99156362	-0.35392	0.052959	1.25e-08	0.856969	ZNF655	5_UTR	4.23E-05
chr15	85291524	-0.234249	0.0350577	1.25e-08	0.917626	ZNF592	Intergenic (nearest gene 293 bp away)	4.23E-05
chr17	30846690	-0.316832	0.0474227	1.26e-08	0.894157	MYO1D	Intron	4.23E-05
chr10	1102947	-0.142989	0.0214029	1.26e-08	0.869388	WDR37	Intron	4.23E-05
chr7	99156358	-0.353831	0.0529629	1.26e-08	0.857026	ZNF655	5_UTR	4.23E-05
chr11	91958046	-0.342121	0.0512229	1.26e-08	0.903116	FAT3	Intergenic (nearest gene 127215 bp away)	4.25E-05
chr15	85292032	-0.21716	0.0325292	1.28e-08	0.919739	ZNF592	Intron	4.29E-05
chr10	1102954	-0.142946	0.0214126	1.28e-08	0.869463	WDR37	Intron	4.29E-05
chr15	85292035	-0.216736	0.0324804	1.29e-08	0.9198	ZNF592	Intron	4.33E-05
chr7	44349593	-0.293025	0.0439182	1.3e-08	0.888764	CAMK2B	Intron	4.34E-05
chr15	85291519	-0.233877	0.0350682	1.31e-08	0.917611	ZNF592	Intergenic (nearest gene 298 bp away)	4.37E-05
chr7	99156337	-0.35334	0.0529822	1.31e-08	0.857323	ZNF655	5_UTR	4.37E-05
chr7	44349590	-0.292784	0.0439304	1.33e-08	0.888708	CAMK2B	Intron	4.41E-05
chr11	91958037	-0.341205	0.0512033	1.34e-08	0.903959	FAT3	Intergenic (nearest gene 127224 bp away)	4.41E-05
chr15	85292044	-0.215434	0.0323311	1.34e-08	0.919988	ZNF592	Intron	4.41E-05
chr11	91959464	-0.341517	0.0513108	1.38e-08	0.837313	FAT3	Intergenic (nearest gene 125797 bp away)	4.51E-05
chr15	85291514	-0.233484	0.0350808	1.38e-08	0.917591	ZNF592	Intergenic (nearest gene 303 bp away)	4.51E-05
chr16	148523	0.315791	0.0474698	1.4e-08	0.0596145	NPRL3	Intron	4.56E-05
chr11	91958027	-0.340183	0.0511802	1.43e-08	0.90489	FAT3	Intergenic (nearest gene 127234 bp away)	4.65E-05
chr15	85292060	-0.213011	0.0320558	1.44e-08	0.920338	ZNF592	Intron	4.67E-05
chr11	91958024	-0.339875	0.0511731	1.46e-08	0.905168	FAT3	Intergenic (nearest gene 127237 bp away)	4.72E-05
chr7	99156289	-0.352096	0.0530187	1.46e-08	0.857988	ZNF655	5_UTR	4.73E-05
chr15	85292064	-0.212383	0.031985	1.46e-08	0.92043	ZNF592	Intron	4.73E-05
chr7	99156286	-0.352012	0.0530206	1.47e-08	0.858028	ZNF655	5_UTR	4.74E-05
chr15	85291508	-0.232984	0.035099	1.48e-08	0.917563	ZNF592	Intergenic (nearest gene 309 bp away)	4.75E-05
chr7	99156283	-0.351928	0.0530226	1.48e-08	0.858069	ZNF655	5_UTR	4.75E-05
chr15	85292067	-0.211907	0.0319314	1.49e-08	0.9205	ZNF592	Intron	4.76E-05
chr15	85291505	-0.232723	0.0351094	1.53e-08	0.917547	ZNF592	Intergenic (nearest gene 312 bp away)	4.88E-05
chr11	91959570	-0.342128	0.051616	1.53e-08	0.839394	FAT3	Intergenic (nearest gene 125691 bp away)	4.88E-05
chr7	99156268	-0.351499	0.0530316	1.53e-08	0.858271	ZNF655	5_UTR	4.88E-05
chr15	85292074	-0.210775	0.0318048	1.54e-08	0.920668	ZNF592	Intron	4.89E-05
chr11	91959580	-0.34222	0.05164	1.54e-08	0.839589	FAT3	Intergenic (nearest gene 125681 bp away)	4.89E-05
chr11	91959586	-0.342275	0.0516542	1.54e-08	0.839708	FAT3	Intergenic (nearest gene 125675 bp away)	4.89E-05
chr7	44349575	-0.291491	0.0439916	1.54e-08	0.888417	CAMK2B	Intron	4.89E-05
chr11	91959615	-0.342548	0.0517213	1.56e-08	0.840285	FAT3	Intergenic (nearest gene 125646 bp away)	4.94E-05
chr11	91959628	-0.342671	0.0517503	1.57e-08	0.840547	FAT3	Intergenic (nearest gene 125633 bp away)	4.96E-05
chr7	44349573	-0.291307	0.0439998	1.58e-08	0.888377	CAMK2B	Intron	4.96E-05
chr11	91959642	-0.342803	0.0517808	1.58e-08	0.84083	FAT3	Intergenic (nearest gene 125619 bp away)	4.96E-05
chr11	91959655	-0.342924	0.0518083	1.58e-08	0.841094	FAT3	Intergenic (nearest gene 125606 bp away)	4.97E-05
chr15	85292080	-0.209784	0.0316944	1.59e-08	0.920817	ZNF592	Intron	4.97E-05
chr15	85291502	-0.232453	0.0351207	1.59e-08	0.91753	ZNF592	Intergenic (nearest gene 315 bp away)	4.97E-05
chr11	91959681	-0.343158	0.0518606	1.6e-08	0.841624	FAT3	Intergenic (nearest gene 125580 bp away)	4.99E-05
chr11	91959700	-0.343321	0.0518962	1.61e-08	0.842011	FAT3	Intergenic (nearest gene 125561 bp away)	4.99E-05
chr7	99156246	-0.350842	0.0530431	1.61e-08	0.858564	ZNF655	5_UTR	4.99E-05
chr11	91959724	-0.343514	0.0519373	1.62e-08	0.8425	FAT3	Intergenic (nearest gene 125537 bp away)	4.99E-05
chr17	30846701	-0.313328	0.0473818	1.62e-08	0.894547	MYO1D	Intron	4.99E-05
chr11	91959750	-0.343701	0.0519763	1.62e-08	0.843028	FAT3	Intergenic (nearest gene 125511 bp away)	4.99E-05
chr11	91959767	-0.343807	0.0519981	1.63e-08	0.843372	FAT3	Intergenic (nearest gene 125494 bp away)	4.99E-05
chr11	91959776	-0.343858	0.0520084	1.63e-08	0.843553	FAT3	Intergenic (nearest gene 125485 bp away)	4.99E-05
chr11	91959779	-0.343875	0.0520116	1.63e-08	0.843613	FAT3	Intergenic (nearest gene 125482 bp away)	4.99E-05
chr11	91958006	-0.338024	0.0511276	1.63e-08	0.906823	FAT3	Intergenic (nearest gene 127255 bp away)	4.99E-05
chr11	91959785	-0.343905	0.0520177	1.63e-08	0.843733	FAT3	Intergenic (nearest gene 125476 bp away)	4.99E-05
chr19	35263649	-0.310531	0.0469709	1.63e-08	0.899318	ZNF599	Intron	4.99E-05
chr11	91959796	-0.343956	0.0520276	1.63e-08	0.843953	FAT3	Intergenic (nearest gene 125465 bp away)	4.99E-05
chr11	91959807	-0.343999	0.052036	1.64e-08	0.844172	FAT3	Intergenic (nearest gene 125454 bp away)	4.99E-05
chr11	91959816	-0.344027	0.0520416	1.64e-08	0.84435	FAT3	Intergenic (nearest gene 125445 bp away)	4.99E-05
chr11	91959839	-0.34407	0.0520507	1.64e-08	0.8448	FAT3	Intergenic (nearest gene 125422 bp away)	4.99E-05
chr19	35263656	-0.310217	0.046936	1.64e-08	0.89903	ZNF599	Intron	4.99E-05
chr19	35263659	-0.31008	0.0469208	1.65e-08	0.898907	ZNF599	Intron	5.00E-05
chr19	35263669	-0.309614	0.0468694	1.67e-08	0.898492	ZNF599	Intron	5.04E-05
chr7	99156227	-0.350249	0.0530514	1.69e-08	0.858814	ZNF655	5_UTR	5.09E-05
chr19	35263683	-0.308934	0.046795	1.69e-08	0.897906	ZNF599	Intron	5.09E-05
chr19	35263687	-0.308734	0.0467732	1.7e-08	0.897737	ZNF599	Intron	5.11E-05
chr19	35263695	-0.308326	0.046729	1.71e-08	0.897398	ZNF599	Intron	5.15E-05
chr19	35263701	-0.308013	0.0466952	1.73e-08	0.897142	ZNF599	Intron	5.17E-05
chr7	44349564	-0.290447	0.0440363	1.73e-08	0.88819	CAMK2B	Intron	5.17E-05
chr19	35263703	-0.307907	0.0466838	1.73e-08	0.897056	ZNF599	Intron	5.17E-05
chr19	35263705	-0.307801	0.0466724	1.74e-08	0.89697	ZNF599	Intron	5.18E-05
chr11	91957995	-0.33689	0.0510979	1.75e-08	0.907822	FAT3	Intergenic (nearest gene 127266 bp away)	5.21E-05
chr19	35263712	-0.307423	0.0466319	1.75e-08	0.896668	ZNF599	Intron	5.21E-05
chr7	44349562	-0.290249	0.0440444	1.77e-08	0.888148	CAMK2B	Intron	5.25E-05
chr7	99156208	-0.349632	0.0530584	1.77e-08	0.85906	ZNF655	5_UTR	5.25E-05
chr11	91957992	-0.33658	0.0510896	1.78e-08	0.908093	FAT3	Intergenic (nearest gene 127269 bp away)	5.27E-05
chr19	35263732	-0.306298	0.046512	1.8e-08	0.895796	ZNF599	Coding_region	5.31E-05
chr19	35263735	-0.306123	0.0464935	1.81e-08	0.895664	ZNF599	Coding_region	5.32E-05
chr11	91957989	-0.336271	0.0510812	1.81e-08	0.908364	FAT3	Intergenic (nearest gene 127272 bp away)	5.33E-05
chr19	35263738	-0.305946	0.0464748	1.81e-08	0.895532	ZNF599	Coding_region	5.33E-05
chr19	35263741	-0.305768	0.046456	1.82e-08	0.895399	ZNF599	Coding_region	5.35E-05
chr7	99156195	-0.349197	0.0530623	1.83e-08	0.859227	ZNF655	5_UTR	5.36E-05
chr7	44349557	-0.28974	0.0440645	1.87e-08	0.88804	CAMK2B	Intron	5.46E-05
chr19	35263770	-0.303961	0.0462668	1.91e-08	0.894097	ZNF599	5_UTR	5.57E-05
chr7	44349555	-0.289532	0.0440725	1.91e-08	0.887996	CAMK2B	Intron	5.57E-05
chr7	99156176	-0.348542	0.0530669	1.92e-08	0.859467	ZNF655	5_UTR	5.59E-05
chr11	91957979	-0.335239	0.0510524	1.93e-08	0.90926	FAT3	Intergenic (nearest gene 127282 bp away)	5.61E-05
chr19	35263779	-0.303369	0.0462053	1.94e-08	0.893686	ZNF599	5_UTR	5.62E-05
chr19	35263782	-0.303168	0.0461845	1.95e-08	0.893548	ZNF599	5_UTR	5.64E-05
chr7	44349553	-0.289321	0.0440805	1.95e-08	0.887952	CAMK2B	Intron	5.64E-05
chr11	91957976	-0.33493	0.0510436	1.97e-08	0.909527	FAT3	Intergenic (nearest gene 127285 bp away)	5.67E-05
chr19	35263791	-0.302554	0.0461212	1.98e-08	0.893133	ZNF599	5_UTR	5.70E-05
chr7	99156163	-0.348082	0.0530693	1.99e-08	0.85963	ZNF655	5_UTR	5.71E-05
chr15	85292118	-0.203023	0.0309612	2e-08	0.92186	ZNF592	Intron	5.73E-05
chr7	99156157	-0.347866	0.0530701	2.02e-08	0.859705	ZNF655	5_UTR	5.77E-05
chr15	85291484	-0.23065	0.03521	2.05e-08	0.917389	ZNF592	Intergenic (nearest gene 333 bp away)	5.84E-05
chr11	91960177	-0.333843	0.0509636	2.05e-08	0.849333	FAT3	Intergenic (nearest gene 125084 bp away)	5.84E-05
chr7	99156144	-0.34739	0.0530716	2.09e-08	0.859866	ZNF655	5_UTR	5.94E-05
chr7	44349547	-0.288672	0.0441043	2.09e-08	0.887817	CAMK2B	Intron	5.95E-05
chr11	91957963	-0.333596	0.051004	2.13e-08	0.910677	FAT3	Intergenic (nearest gene 127298 bp away)	6.04E-05
chr15	85292128	-0.201103	0.0307604	2.15e-08	0.922159	ZNF592	Intron	6.08E-05
chr11	91960201	-0.332002	0.0507846	2.15e-08	0.849399	FAT3	Intergenic (nearest gene 125060 bp away)	6.08E-05
chr7	99156126	-0.346715	0.0530726	2.19e-08	0.860086	ZNF655	5_UTR	6.18E-05
chr15	85292131	-0.200515	0.0306997	2.2e-08	0.92225	ZNF592	Intron	6.20E-05
chr7	99156124	-0.346639	0.0530727	2.2e-08	0.860111	ZNF655	5_UTR	6.20E-05
chr7	99156122	-0.346563	0.0530727	2.22e-08	0.860135	ZNF655	5_UTR	6.21E-05
chr11	91960218	-0.330592	0.0506491	2.24e-08	0.849421	FAT3	Intergenic (nearest gene 125043 bp away)	6.27E-05
chr15	85291478	-0.229972	0.0352489	2.26e-08	0.917327	ZNF592	Intergenic (nearest gene 339 bp away)	6.33E-05
chr7	99156111	-0.346138	0.0530726	2.28e-08	0.860268	ZNF655	5_UTR	6.37E-05
chr15	85292136	-0.199523	0.0305983	2.29e-08	0.922404	ZNF592	Intron	6.39E-05
chr7	99156103	-0.345826	0.0530723	2.33e-08	0.860364	ZNF655	5_UTR	6.50E-05
chr15	85292140	-0.198718	0.0305169	2.37e-08	0.922529	ZNF592	Intron	6.58E-05
chr7	99156097	-0.345589	0.0530719	2.37e-08	0.860436	ZNF655	5_UTR	6.58E-05
chr11	91960248	-0.327882	0.0503925	2.42e-08	0.849408	FAT3	Intergenic (nearest gene 125013 bp away)	6.69E-05
chr15	85292143	-0.198108	0.0304558	2.44e-08	0.922623	ZNF592	Intron	6.73E-05
chr11	91960251	-0.327595	0.0503656	2.44e-08	0.849403	FAT3	Intergenic (nearest gene 125010 bp away)	6.73E-05
chr11	91960253	-0.327402	0.0503476	2.45e-08	0.849399	FAT3	Intergenic (nearest gene 125008 bp away)	6.76E-05
chr7	99156084	-0.345068	0.0530706	2.46e-08	0.86059	ZNF655	5_UTR	6.77E-05
chr11	91960261	-0.326618	0.0502744	2.51e-08	0.849382	FAT3	Intergenic (nearest gene 125000 bp away)	6.89E-05
chr7	99156074	-0.344661	0.0530692	2.53e-08	0.860708	ZNF655	5_UTR	6.93E-05
chr15	85292148	-0.197078	0.0303539	2.55e-08	0.92278	ZNF592	Intron	6.97E-05
chr11	91960272	-0.325506	0.0501712	2.59e-08	0.84935	FAT3	Intergenic (nearest gene 124989 bp away)	7.08E-05
chr10	1103214	-0.141346	0.0217868	2.6e-08	0.872139	WDR37	Intron	7.08E-05
chr10	1103219	-0.141315	0.0217942	2.63e-08	0.872188	WDR37	Intron	7.17E-05
chr15	85292152	-0.196242	0.0302725	2.65e-08	0.922908	ZNF592	Intron	7.20E-05
chr15	85292155	-0.195608	0.0302114	2.73e-08	0.923003	ZNF592	Intron	7.41E-05
chr11	91960289	-0.323711	0.0500059	2.74e-08	0.849282	FAT3	Intergenic (nearest gene 124972 bp away)	7.43E-05
chr10	1103234	-0.141223	0.0218165	2.74e-08	0.872334	WDR37	Intron	7.43E-05
chr7	44349524	-0.285945	0.0441927	2.77e-08	0.887269	CAMK2B	Intron	7.49E-05
chr7	44349522	-0.28569	0.0442001	2.84e-08	0.887219	CAMK2B	Intron	7.67E-05
chr10	1103251	-0.141118	0.0218418	2.87e-08	0.872499	WDR37	Intron	7.73E-05
chr10	1103256	-0.141087	0.0218493	2.91e-08	0.872548	WDR37	Intron	7.83E-05
chr15	85291463	-0.228088	0.0353685	3e-08	0.917133	ZNF592	Intergenic (nearest gene 354 bp away)	8.01E-05
chr15	85292170	-0.192349	0.0299091	3.21e-08	0.923488	ZNF592	Intron	8.42E-05
chr7	44349511	-0.284234	0.0442401	3.29e-08	0.886938	CAMK2B	Intron	8.61E-05
chr7	44349509	-0.28396	0.0442471	3.38e-08	0.886885	CAMK2B	Intron	8.82E-05
chr15	85292176	-0.191002	0.0297904	3.46e-08	0.923683	ZNF592	Intron	9.01E-05
chr7	44349504	-0.283261	0.0442646	3.62e-08	0.886752	CAMK2B	Intron	9.39E-05
chr7	44349501	-0.282832	0.0442749	3.77e-08	0.886672	CAMK2B	Intron	9.71E-05
chr15	85291450	-0.226194	0.0355044	4.03e-08	0.916912	ZNF592	Intergenic (nearest gene 367 bp away)	0.000102877
chr15	85292189	-0.187991	0.0295412	4.14e-08	0.924106	ZNF592	Intron	0.000104985
chr15	85292191	-0.187517	0.0295042	4.26e-08	0.924171	ZNF592	Intron	0.000107751
chr11	91960408	-0.308491	0.0486552	4.51e-08	0.848194	FAT3	Intergenic (nearest gene 124853 bp away)	0.000112851
chr11	91960411	-0.308048	0.0486169	4.58e-08	0.848153	FAT3	Intergenic (nearest gene 124850 bp away)	0.000113706
chr7	44349487	-0.280741	0.0443211	4.62e-08	0.886283	CAMK2B	Intron	0.000114331
chr15	85292198	-0.18583	0.0293781	4.77e-08	0.924397	ZNF592	Intron	0.00011725
chr15	85291443	-0.225053	0.0355928	4.82e-08	0.91677	ZNF592	Intergenic (nearest gene 374 bp away)	0.000117877
chr6	99048153	0.275922	0.0499652	9.38e-07	0.0450724	PNKY	Intergenic (nearest gene 229863 bp away)	0.00158495
chr6	99048169	0.275902	0.0499778	9.44e-07	0.0450844	PNKY	Intergenic (nearest gene 229847 bp away)	0.00159123
chr6	99048189	0.275875	0.0499935	9.52e-07	0.0450995	PNKY	Intergenic (nearest gene 229827 bp away)	0.00160019
chr6	99048220	0.275833	0.0500175	9.65e-07	0.045123	PNKY	Intergenic (nearest gene 229796 bp away)	0.00161793
chr6	99068467	0.189991	0.0494187	0.000315702	0.0859456	PNKY	Intergenic (nearest gene 209549 bp away)	0.167279
